# Supplementary material for: Improving promiscuous mammalian cell entry by the baculovirus Autographa californica multiple nuclear polyhedrosis virus
Source: PubMed Central journal article supplement — Biosci Rep. 2012 Nov 30;33(1):e00003. doi: 10.1042/BSR20120093 (PMC3522474; doi:10.1042/bsr20120093), 2012-11-30
Supplement: bsr033e003add.pdf [file bsr033e003add.pdf]

## SUPPLEMENTARY DATA

# Improving promiscuous mammalian cell entry by the baculovirus *Autographa californica* multiple nuclear polyhedrosis virus

Neil M. J. O'FLYNN\*, Avnish PATEL\*, Jan KADLEC† and Ian M. JONES\*<sup>1</sup>

\*School of Biological Sciences, University of Reading, Reading RG6 6AJ, U.K., and †European Molecular Biology Laboratory, BP 181, 6 rue Jules Horowitz, 38042 Grenoble Cedex 9, France

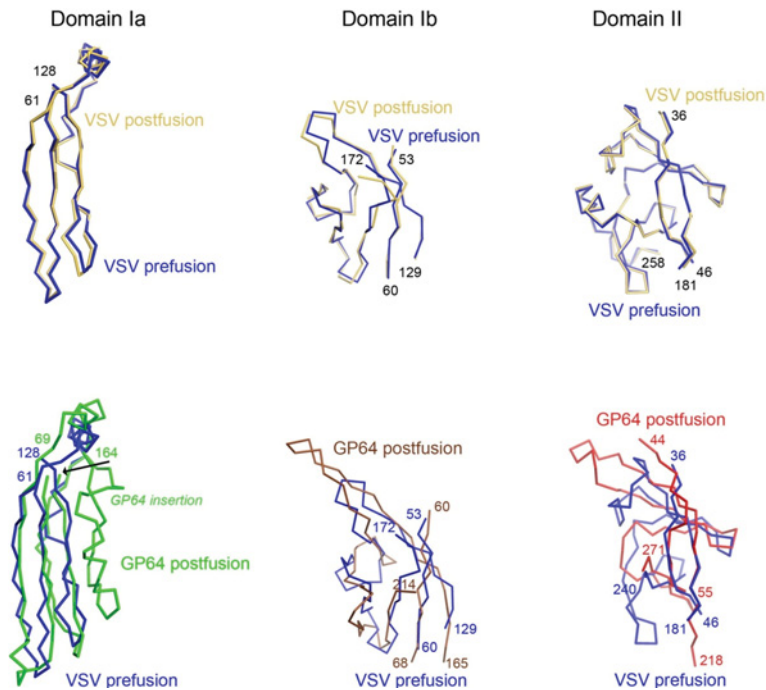

**Figure S1 Superimposition of individual domains of gp64 and VSV G as indicated**

Domains 1a, 1b and II do not change appreciably between the pre- and post-fusion structures of VSV G protein (top). Similarly the post fusion structures of the gp64 domains map onto the prefusion structures of VSV G (bottom). Number and colours identify amino acids to their cognate protein.

<sup>1</sup> To whom correspondence should be addressed (email i.m.jones@rdg.ac.uk).

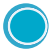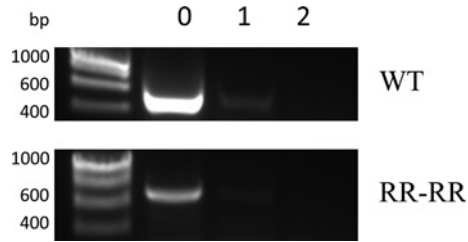

**Figure S2 Relative Q-PCR quantitation of the concentrated baculovirus stocks of WT and RR-RR used for mammalian cell transduction using primers to the inserted eGFP sequence**  
Mutant RR-RR routinely grew to ~3-fold lower titres than the WT.

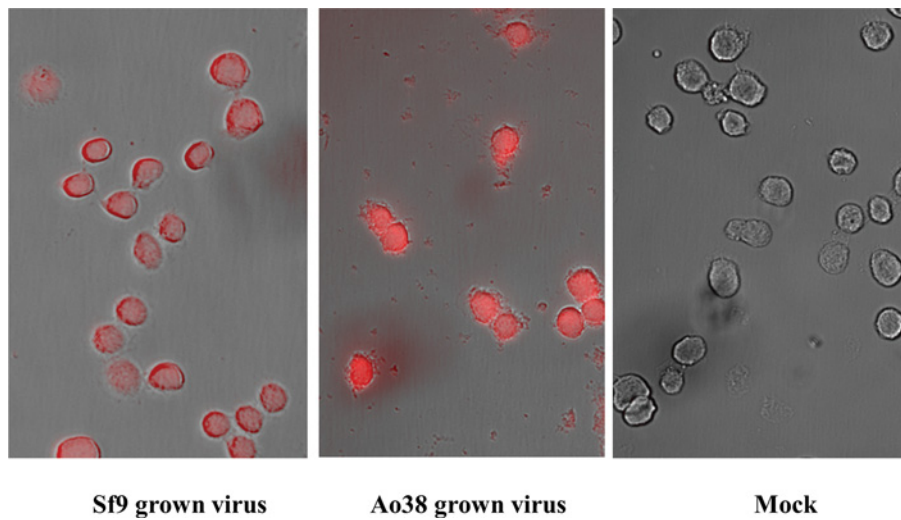

**Figure S3 Stocks of AcMNPV grown to equivalent titre in Sf9 and Ao38 cells were used to infect Sf9 cells and analysed as described in the text and legend relating to Figure 8 of the main paper**  
The fields shown are typical and no difference was seen in uptake between the two preparations.

---

Received 29 August 2012/25 September 2012; accepted 2 October 2012

Published as Immediate Publication 4 October 2012, doi 10.1042/BSR20120093

---
